# Supplementary material for: Phenotypic and Safety Assessment of the Cheese Strain Lactiplantibacillus plantarum LL441, and Sequence Analysis of its Complete Genome and Plasmidome
Source: MDPI journal article supplement (doi:10.3390/ijms24010605), 2022-12-29
Supplement: s1 [file s1]

**Table S1.** Presence of catabolic genes in the genome (chromosome or plasmids) of *Lactiplantibacillus plantarum* LL441 involved in growth in milk and formation of flavour (taste and aroma) compounds.

| Protein/Description                          | Gene/Operon    | Function                                                                                    | Chromosome | Plasmid    |
|----------------------------------------------|----------------|---------------------------------------------------------------------------------------------|------------|------------|
| <b>Proteases</b>                             |                |                                                                                             |            |            |
| ATP-dependent zinc metalloprotease           | <i>ftsH</i>    | Cleavage of transmembrane sequences, cell division                                          | 1          |            |
| Clp protease                                 | <i>clpCEPX</i> | Turnover of cellular proteins                                                               | 1          |            |
| ClpCP protease substrate adapter protein     | <i>mecA</i>    | Activates protein degradation by ClpCP complex                                              | 1          |            |
| DegP/HtrA serine protease                    | <i>htrA</i>    | Clearance of denatured or aggregated proteins from the inner-membrane and periplasmic space | 1          |            |
| Hsl protease                                 | <i>hslUV</i>   | ATP-binding and protease subunits                                                           | 1          |            |
| Intracellular protease                       | -              | -                                                                                           | 1          |            |
| Late competence processing protease          | <i>comC</i>    | Processing of DNA during uptake                                                             |            |            |
| Lon-like protease with PDZ domain            | -              | Quality-control of proteins                                                                 | 1          |            |
| Membrane-associated zinc metalloprotease     | <i>yugP</i>    | Hydrolyses Met if followed by Ala, Pro, or Ser                                              | 1          |            |
| Membrane protease family protein             | -              | -                                                                                           | 1          |            |
| Periplasmic protease                         | -              | -                                                                                           | 1          |            |
| Phage proteases                              | -              | -                                                                                           | 1          |            |
| SOS-response repressor and protease          | <i>lexA</i>    | Autoproteolysis in SOS response                                                             | 1          |            |
| YmfH protease                                | <i>ymfH</i>    |                                                                                             | 1          |            |
| Zinc protease                                | -              | -                                                                                           | 1          |            |
| <b>Peptidases</b>                            |                |                                                                                             |            |            |
| D-alanyl-D-alanine dipeptidase               | -              | -                                                                                           | 1          |            |
| Aminopeptidase C                             | <i>pepC</i>    | General cysteine aminopeptidase                                                             | 2          |            |
| Aminopeptidase YpdF                          | <i>ypdF</i>    | Hydrolyses Xaa-Pro bonds when Xaa is Ala, Asn or Met                                        | 1          |            |
| D-alanyl-D-alanine carboxypeptidase          | <i>dacA</i>    | Cross-linking of peptidoglycan chains; PBP                                                  | 2          |            |
| Dipeptidase                                  | -              | -                                                                                           | 4          |            |
| ImmA/IrrE family metallo-endopeptidase       | -              | -                                                                                           | -          | 1 pLL441-1 |
| Lysyl aminopeptidase                         | -              | -                                                                                           | 1          |            |
| M15 family metallopeptidase                  | -              | Cell wall biosynthesis                                                                      | 1          |            |
| Methionine aminopeptidase                    | <i>pepM</i>    | Release of Met from proteins and peptides                                                   | 1          |            |
| Multimodular transpeptidase-transglycosylase | -              | Peptidoglycan biosynthesis, probably PBPs                                                   | 2          |            |
| Muramoyl tetrapeptide carboxypeptidase       | -              | -                                                                                           | 1          |            |

|                                                               |                |                                                                                          |   |             |
|---------------------------------------------------------------|----------------|------------------------------------------------------------------------------------------|---|-------------|
| Neutral endopeptidase                                         | <i>pepO</i>    | Degradation of casein-derived peptides                                                   | 1 |             |
| Oligoendopeptidase F                                          | <i>pepF</i>    | Hydrolyses 7-17 amino acids long peptides                                                | 2 |             |
| Proline iminopeptidase                                        | <i>pepI</i>    | Releases proline from peptides                                                           | 3 |             |
| SprT-family zinc metallopeptidase                             | <i>sprT</i>    | -                                                                                        | 1 |             |
| Tripeptide aminopeptidase                                     | <i>pepT</i>    | Amino degradation of tripeptides                                                         | 1 |             |
| Xaa-His dipeptidase                                           | <i>pepV</i>    | Hydrolysis of Xaa-His dipeptides                                                         | 1 |             |
| Xaa-Pro dipeptidase                                           | <i>pepX</i>    | Release dipeptides when Pro is at the second position                                    | 2 |             |
| <b>Lactose, citrate, amino acid, and peptide transporters</b> |                |                                                                                          |   |             |
| Amino acid permease, GabP family                              | -              | Transport of amino acids                                                                 | 5 |             |
| Amino acid permease, YdaO                                     | <i>ydaO</i>    | Transport of amino acids                                                                 | 1 |             |
| Cysteine ABC transporter                                      | <i>cydCD</i>   | Transport of cysteine                                                                    | 1 |             |
| Di-tripeptide/cation symporter DtpT                           | <i>dtpT</i>    | Transport of di- and tripeptides                                                         | 1 |             |
| D-serine/D-alanine/glycine transporter                        | -              | Transporter of serine, alanine, glycine                                                  | 3 |             |
| Glutamine ABC transporter                                     | <i>glnHPQ</i>  | Transport of basic amino acids                                                           | 1 |             |
| Lactose permease                                              | <i>lacP</i>    | Transport of lactose                                                                     | 2 | 1, pLL441-2 |
| $\beta$ -galactosidase                                        | <i>lacZ</i>    | Lactose degradation                                                                      | 1 |             |
| $\beta$ -galactosidase LacLM                                  | <i>lacLM</i>   | Lactose degradation                                                                      | 1 | 1, pLL441-2 |
| Methionine ABC transporter                                    | -              | Transport of Met                                                                         | 3 |             |
| Na(+)-dependent branched-chain amino acid transporter         | <i>brnQ</i>    | Transport of branched chain amino acids                                                  | 2 |             |
| Oligopeptide ABC transporter                                  | <i>oppABCD</i> | Transport of oligopeptides                                                               | 1 |             |
| Oligopeptide ABC transporter                                  | <i>oppA</i>    | Substrate binding protein                                                                | 5 |             |
| Proton/glutamate symporter                                    | -              | Transport of glutamate                                                                   | 1 |             |
| Serine transporter                                            | -              | Transport of serine                                                                      | 1 |             |
| Tyrosine transporter                                          | <i>nhaC</i>    | Transport of tyrosine                                                                    | 2 |             |
| <b>Aminotransferases and transaminases</b>                    |                |                                                                                          |   |             |
| Aspartate aminotransferase                                    | <i>aspAT</i>   | Reversible transfer of a $\alpha$ -amino group between Asp and Glu                       | 6 |             |
| Branched-chain amino acid aminotransferase                    | <i>bcaT</i>    | Cys, Val, Leu, Iso and Met, synthesis and metabolism, synthesis of secondary metabolites | 1 |             |
| Glutamine amidotransferase, class 1                           | <i>pfpI</i>    | Removal of the ammonia group from glutamine                                              | 2 |             |
| Glutamine-dependent 2-keto-4-methylthiobutyrate transaminase  | -              | Cys and Met metabolism, metabolic pathways                                               | 1 |             |
| Glutamine-fructose-6-P aminotransferase                       | <i>glmS</i>    | Ala and Glu, metabolism, metabolic pathways                                              | 1 |             |
| Histidinol-phosphate aminotransferase                         | -              | Glu and His metabolic pathways                                                           | 1 |             |

|                                              |                 |                                                                                                          |   |             |
|----------------------------------------------|-----------------|----------------------------------------------------------------------------------------------------------|---|-------------|
| L,D-transpeptidase                           | -               | Cross-linking of peptide stems in peptidoglycans                                                         | 1 |             |
| Multimodular transpeptidase-transglycosidase | -               | -                                                                                                        | 2 |             |
| N-acetylornithine aminotransferase           | <i>rocD</i>     | Arg biosynthesis, metabolic pathways, synthesis of secondary metabolites                                 | 1 |             |
| Phosphoserine aminotransferase               | -               | Gly, Ser, Thr, Cys and Met metabolism, synthesis of secondary metabolites                                | 1 |             |
| Pyruvate transaminase                        | -               | Ala metabolism                                                                                           | 1 |             |
| <b>Dehydrogenases</b>                        |                 |                                                                                                          |   |             |
| 1,3-propanediol dehydrogenase                | -               | Glycerolipid, propanoate metabolism                                                                      | 1 |             |
| Aldehyde dehydrogenase                       | <i>adhE</i>     | Fatty acids degradation, amino acids synthesis and degradation, synthesis of secondary metabolites       | 1 |             |
| Alanine dehydrogenase                        | <i>ala-dh</i>   | Ala, Asp and Glu metabolism, metabolic pathways                                                          | 1 |             |
| Alcohol dehydrogenase class III              | <i>adh</i>      | Glycolysis, fatty acid degradation, Tyr metabolism, pyruvate metabolism                                  | 3 | 1, pLL441-2 |
| D-lactate dehydrogenase                      | <i>ldhD</i>     | Synthesis of secondary metabolites                                                                       | 2 |             |
| L-lactate dehydrogenase                      | <i>ldhL</i>     | Glycolysis, Cys and Met metabolism, synthesis of secondary metabolites                                   | 5 |             |
| Homoserine dehydrogenase                     | -               | Gly, Ser, Thr and Cys, Met metabolism, Lys synthesis, metabolic pathways                                 | 2 |             |
| NADP-specific glutamate dehydrogenase        | <i>gdhA</i>     | Arg synthesis, Ala and Asp metabolism, metabolic pathways                                                | 1 |             |
| Histidinol dehydrogenase                     | -               | His biosynthesis and biosynthesis of secondary metabolites                                               | 1 |             |
| <b>Lyases</b>                                |                 |                                                                                                          |   |             |
| Argininosuccinate lyase                      | -               | Arg biosynthesis, Ala, Asp and Glu metabolism, metabolic pathways, biosynthesis of secondary metabolites | 1 |             |
| Argininosuccinate synthase                   | -               | Arg biosynthesis, Ala, Asp and Glu metabolism, metabolic pathways, biosynthesis of secondary metabolites | 1 |             |
| Citrate lyase complex                        | <i>citCDEFG</i> | Formation of pyruvate from citrate                                                                       | 1 |             |
| Cystathionine beta-lyase                     | <i>cglB</i>     | Production of sulphur compounds                                                                          | 1 |             |
| Cystathionine beta-synthase                  | <i>cbs</i>      | Transulfuration from homocysteine to cystathionine                                                       | 1 |             |
| Cystathionine gamma-lyase                    | <i>cglA</i>     | Gly, Ser, Met, Cys and Thr metabolism, metabolic pathways                                                | 1 |             |
| Cystathionine gamma-synthase                 | <i>cgs</i>      | Formation of cystathionine from cysteine                                                                 | 1 |             |
| D-serine ammonia-lyase                       | -               | Gly, Ser and Thr metabolism, D-amino acid metabolism, metabolic pathways                                 | 1 |             |
| S-ribosylhomocysteine lyase                  | <i>luxS</i>     | Cys and Met metabolism, metabolic pathways                                                               | 1 |             |

|                                             |             |                                                                               |   |
|---------------------------------------------|-------------|-------------------------------------------------------------------------------|---|
| Aspartate ammonia-lyase                     | <i>aspA</i> | Ala, Asp and Glu metabolism                                                   | 1 |
| Aspartate ammonia-ligase                    | <i>asnA</i> | Ala, Gsp and Glu metabolism                                                   | 1 |
| <b>Esterases/lipases</b>                    |             |                                                                               |   |
| Alpha/beta hydrolase                        | -           | Lipid transport and metabolism                                                | 3 |
| Hydrolase HAD                               | -           | -                                                                             | 7 |
| Esterase/lipase                             | <i>estA</i> | Lipid transport and metabolism                                                | 1 |
| Glycerophosphoryl diester phosphodiesterase | <i>glpQ</i> | Glycerophospholipid metabolism                                                | 2 |
| Lipase/Acylhydrolase                        | -           | -                                                                             | 1 |
| Phosphoesterase                             | -           | Release of membrane-linked proteins with glycosylphosphatidylinositol anchors | 1 |

---

Colours denote different functional categories.

**Table S2.** Presence of “probiotic marker genes” (PMGs<sup>a</sup>) involved in stress resistance (acid, osmotic, oxidative, temperature), bile salt hydrolase activity, adhesion ability or gut persistence in the *Lactiplantibacillus plantarum* LL441 genome (chromosome or plasmids).

| Protein/description                          | Gene/operon         | Function                                                                               | Chromosome | Plasmid |
|----------------------------------------------|---------------------|----------------------------------------------------------------------------------------|------------|---------|
| 1-acylglycerol-3-phosphate O-acyltransferase | <i>plsC</i>         | Acid stress                                                                            | 1          |         |
| 60 kDa chaperonin                            | <i>groL / groEL</i> | Acid stress                                                                            | 1          |         |
| ATP synthase                                 | <i>atpABCDEFGH</i>  | Acid stress                                                                            | 1          |         |
| ATP-dependent Clp protease                   | <i>clpCEPX</i>      | Acid stress                                                                            | 1          |         |
| Chaperone protein ClpB                       | <i>clpB</i>         | Acid stress                                                                            | 1          |         |
| D-alanine-D-alanyl carrier protein ligase    | <i>dltA</i>         | Acid stress                                                                            | 1          |         |
| Glucose-6-phosphate isomerase                | <i>gpi</i>          | Acid stress                                                                            | 1          |         |
| Glutamate decarboxylase                      | <i>gadB</i>         | Acid stress                                                                            | 1          |         |
| Glyceraldehyde-3-phosphate dehydrogenase     | <i>gap</i>          | Acid stress                                                                            | 1          |         |
| GMP synthase [glutamine-hydrolyzing]         | <i>guaA</i>         | Acid stress                                                                            | 1          |         |
| GTP pyrophosphokinase                        | <i>relA</i>         | Acid stress                                                                            | 2          |         |
| L-lactate dehydrogenase                      | <i>ldh</i>          | Acid stress                                                                            | 5          |         |
| D-alanine transfer protein                   | <i>dltD</i>         | Acid stress                                                                            | 1          |         |
| Protein RecA                                 | <i>recA</i>         | Acid stress                                                                            | 1          |         |
| Pyruvate kinase                              | <i>pyk</i>          | Acid stress                                                                            | 1          |         |
| Triosephosphate isomerase                    | <i>tpiA</i>         | Acid stress                                                                            | 1          |         |
| Chaperone protein DnaK / HSP-70              | <i>dnaK</i>         | Acid stress / bile resistance                                                          | 1          |         |
| Copper transporting ATPase                   | <i>copA</i>         | Acid stress / bile resistance                                                          | 1          | -       |
| Enolase                                      | <i>eno</i>          | Acid stress / bile resistance                                                          | 2          |         |
| Ornithine carbamoyltransferase               | <i>arcB</i>         | Acid stress / bile resistance                                                          | 1          |         |
| Phosphoglycerate kinase                      | <i>pgk</i>          | Acid stress / bile resistance                                                          | 1          |         |
| 10 kDa chaperonin                            | <i>groS / groES</i> | Acid stress / bile resistance / temperature                                            | 1          |         |
| Chaperone protein DnaJ                       | <i>dnaJ</i>         | Acid stress / bile resistance / temperature                                            | 1          |         |
| Heat shock protein GrpE / HSP-70 cofactor    | <i>grpE</i>         | Acid stress / bile resistance / temperature                                            | 1          |         |
| Serine protease HtrA                         | <i>htrA / degP</i>  | Acid stress / bile resistance / temperature                                            | 1          |         |
| S-ribosylhomocysteine lyase                  | <i>luxS</i>         | Acid stress / bile resistance / temperature /<br>production of antimicrobial compounds | 1          |         |
| 30S ribosomal protein S3                     | <i>rpsC</i>         | Bile resistance                                                                        | 1          |         |
| 30S ribosomal protein S5                     | <i>rpsE</i>         | Bile resistance                                                                        | 1          |         |

|                                                                                         |                                   |                            |   |          |
|-----------------------------------------------------------------------------------------|-----------------------------------|----------------------------|---|----------|
| 50S ribosomal protein L4                                                                | <i>rplD</i>                       | Bile resistance            | 1 | -        |
| 50S ribosomal protein L5                                                                | <i>rplE</i>                       | Bile resistance            | 1 |          |
| 50S ribosomal protein L6                                                                | <i>rplF</i>                       | Bile resistance            | 1 |          |
| Arginine-tRNA synthetase (ligase)                                                       | <i>argS</i>                       | Bile resistance            | 1 |          |
| Choloylglycine hydrolase                                                                | <i>cbh / bsh</i>                  | Bile resistance            | 3 |          |
| CTP synthase                                                                            | <i>pyrG</i>                       | Bile resistance            | 1 |          |
| DD-transpeptidase / penicillin-sensitive transpeptidase / penicillin-binding protein 1A | <i>ponA / pbp1A</i>               | Bile resistance            | 1 |          |
| Dihydrolipoyl dehydrogenase                                                             | <i>pdhD / lpdA</i>                | Bile resistance            | 1 |          |
| DNA protection during starvation protein                                                | <i>dps</i>                        | Bile resistance            | 1 |          |
| Endopeptidase PepO                                                                      | <i>pepO</i>                       | Bile resistance            | 1 |          |
| Glucosamine-6-phosphate deaminase                                                       | <i>nagB / gnp</i>                 | Bile resistance            | 1 |          |
| Glutamine synthetase                                                                    |                                   | Bile resistance            | 1 |          |
| Oligopeptide-binding protein OppA                                                       | <i>oppA</i>                       | Bile resistance            | 6 |          |
| Sortase A                                                                               | <i>srtA</i>                       | Bile resistance / adhesion | 1 | pLL441-7 |
| Glycerol facilitator-aquaporin Z                                                        | <i>gla</i>                        | Osmotic stress             | 1 |          |
| Glycerol uptake facilitator                                                             | <i>glpF</i>                       | Osmotic stress             | 5 |          |
| Glycine betaine transport system                                                        | <i>opuAA, opuAB</i>               | Osmotic stress             | 1 |          |
| Choline transport system                                                                | <i>opuBA, opuBB, opuBC, opuBD</i> | Osmotic stress             | 1 |          |
| Glycine betaine/carnitine transport permease protein GbuB                               | <i>gbuB</i>                       | Osmotic stress             | 1 |          |
| Peptide methionine sulfoxide reductase MsrB                                             | <i>msrB</i>                       | Oxidative stress           | 1 |          |
| Exodeoxyribonuclease III                                                                | <i>exoA</i>                       | Adhesion                   | 1 |          |
| Lipoprotein signal peptidase                                                            | <i>lspA</i>                       | Adhesion                   | 1 |          |
| PTS system, cellobiose-specific EIIC component                                          | <i>celB</i>                       | Gut persistence            | 7 |          |
| Pyruvate carboxylase                                                                    | <i>pycA</i>                       | Adhesion                   | 1 |          |
| Trehalose-6-phosphate hydrolase                                                         | <i>treA</i>                       | Gut persistence            | 2 |          |

<sup>a</sup>PMGs as defined by Carpi et al. (2022). Only complete genes are being reported; Colours denote different functional categories.

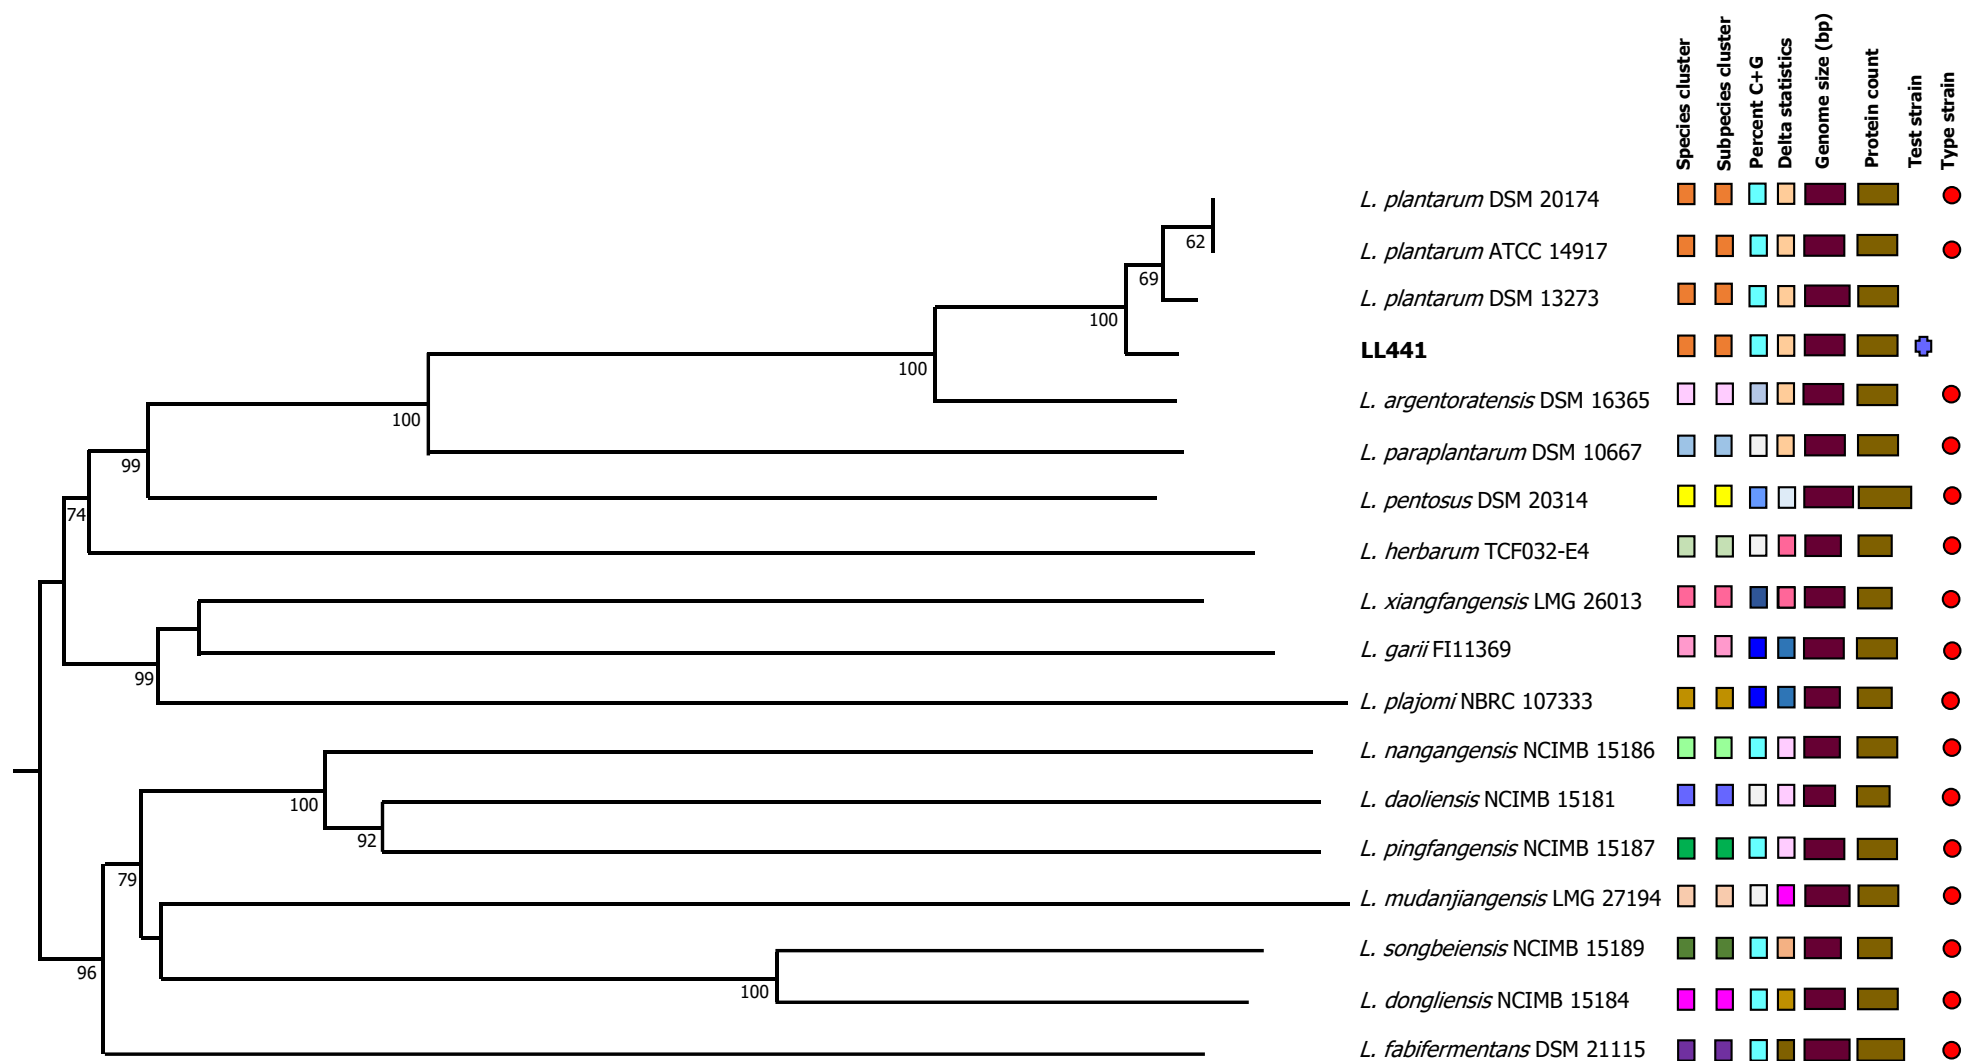

**Figure S1.-** Phylogenomic analysis of LL441 and strains of species and subspecies of the *Lactiplantibacillus plantarum* group. The tree was inferred from Genome BLAST Distance Phylogeny (GBDP) with FastME 2.1.6.1 at the DSMZ Type Strain Genome Server (<http://ggdc.dsmz.de/>; Accessed on November 2022). Branch lengths were scaled in terms of the approach distance of formula d5. The numbers above branches are GBDP pseudo-bootstrap support values >60% from 100 replications (average branch support of 85.2%). The tree was rooted at the midpoint. The colour scheme on the right denotes with the same tone strains considered as belonging to the same taxon.
